# Supplementary material
Source: PubMed Central journal article supplement (PMC1450246)

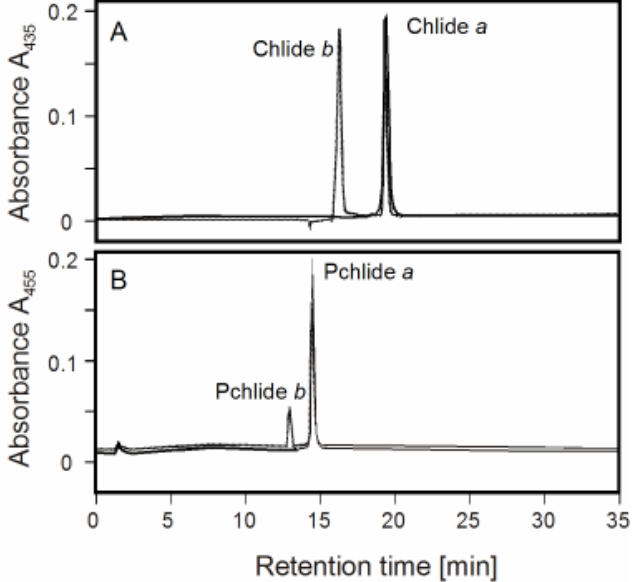

Supplement: pnas_0511066103_1.pdf [file pnas_0511066103_1.pdf]

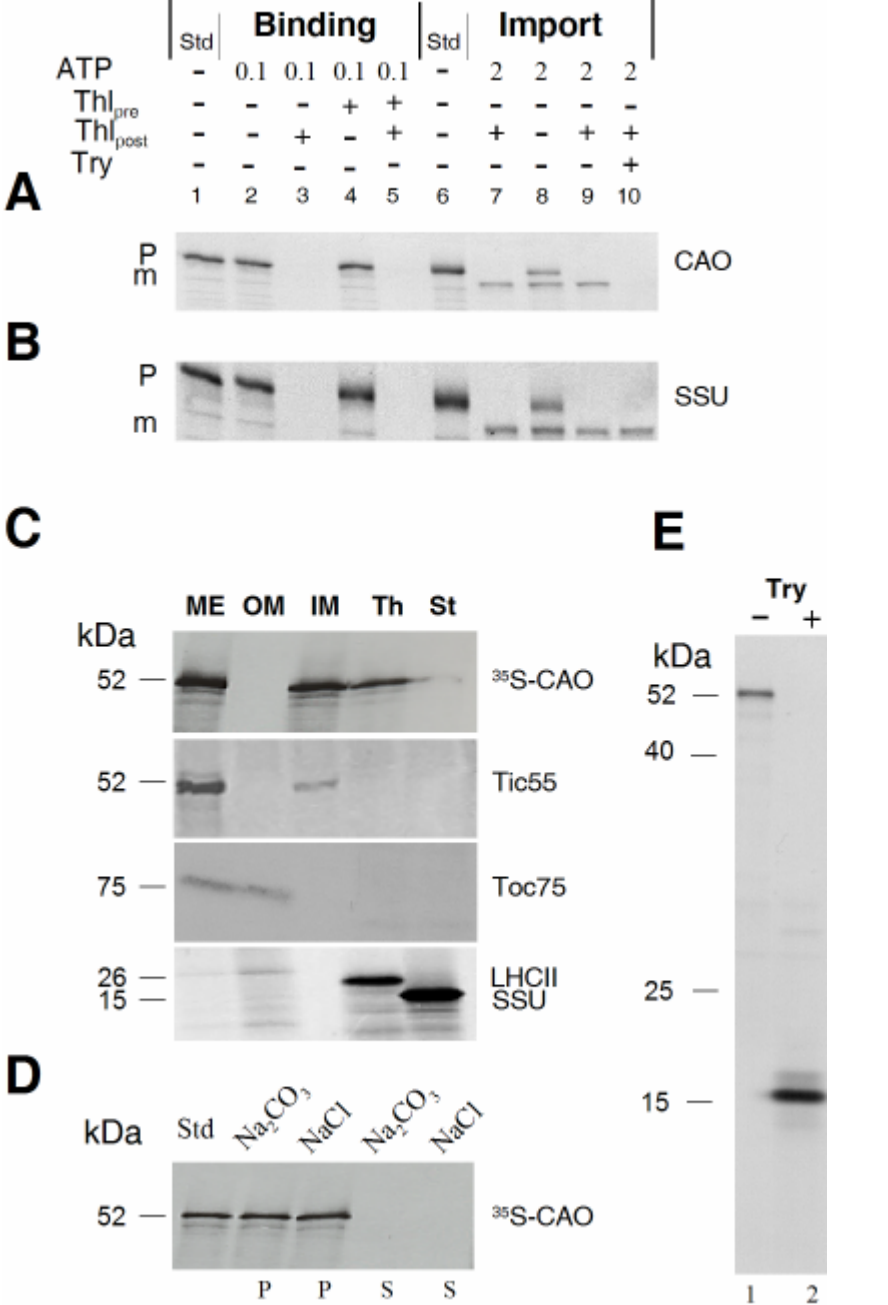

Supplement: pnas_0511066103_2.pdf [file pnas_0511066103_2.pdf]
